# Supplementary material for: Feasibility of automated proton therapy plan adaptation for head and neck tumors using cone beam CT images
Source: Springer Nature journal article supplement (doi:10.1186/s13014-016-0641-7), 2016-04-29
Supplement: MOESM1 [file 10111638]

Additional file 1

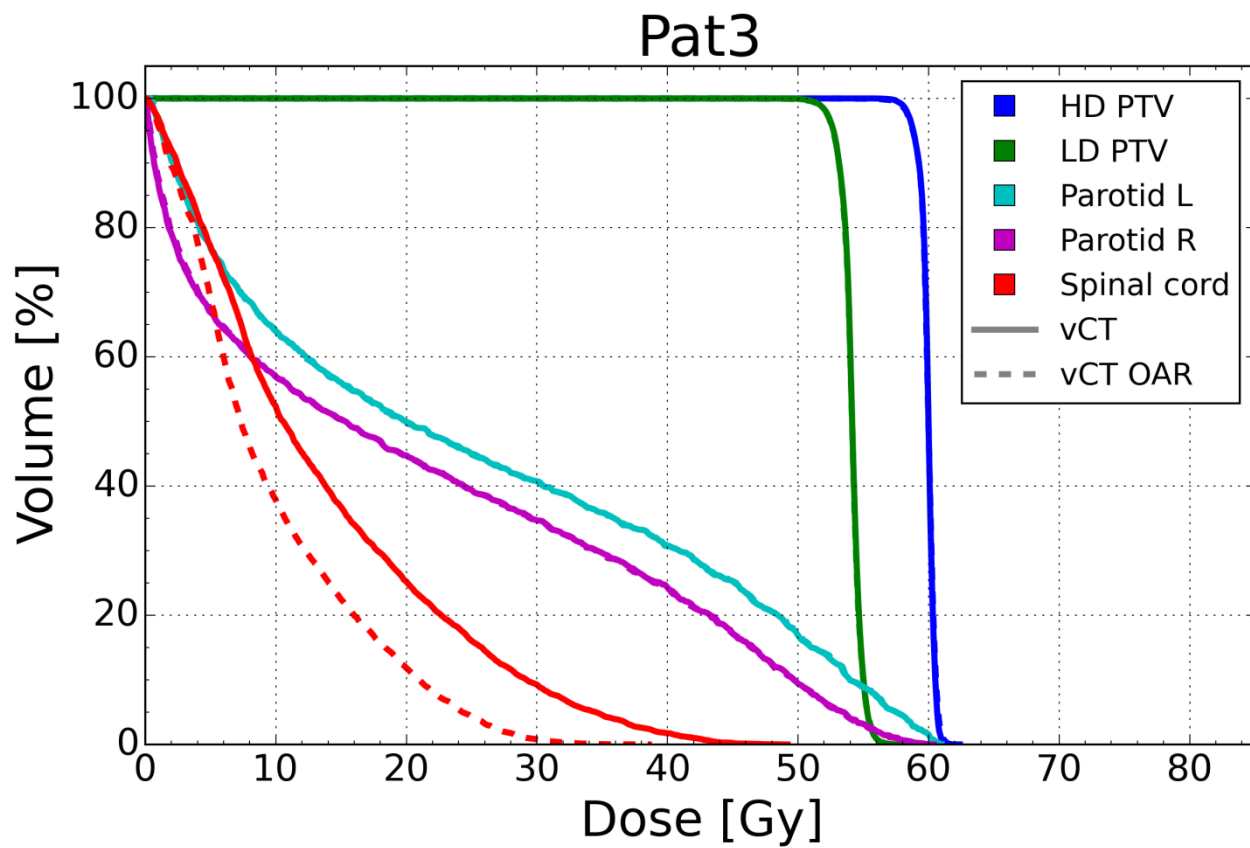

**Figure S1.** DVH curves for Pat3. The adapted plan (calculated on the vCT) is compared to a re-optimized plan with a tighter constraint of 22 Gy for the maximum dose in the spinal cord. The original adapted plan is labelled vCT on the figure, while the plan with tighter constraints is labelled vCT OAR.

**Table S1.** Patient target structure volumes from the pCT and rpCT. All volumes in cm<sup>3</sup>. Patient neck volume changes were computed using the body contour in the neck region, excluding slices below the shoulders and above the jaw. This was not computed for patients with nasal cavity lesions.

| Patient identifier | LD CTV |      | LD PTV |      | HD CTV |      | HD PTV |      | Neck volume change rpCT vs pCT (%) |
|--------------------|--------|------|--------|------|--------|------|--------|------|------------------------------------|
|                    | pCT    | rpCT | pCT    | rpCT | pCT    | rpCT | pCT    | rpCT |                                    |
| Pat1               | 179    | 180  | 418    | 418  | -      | -    | -      | -    | 0                                  |
| Pat2               | 564    | 491  | 1087   | 983  | 49     | 34   | 127    | 102  | -8                                 |
| Pat3               | 365    | 359  | 772    | 762  | 157    | 158  | 345    | 352  | -4                                 |
| Pat4               | 637    | 666  | 1129   | 1114 | 206    | 211  | 408    | 407  | 1                                  |
| Pat5               | 985    | 992  | 1783   | 1769 | 349    | 354  | 790    | 797  | -5                                 |
| Pat6               | 535    | 550  | 996    | 998  | 193    | 193  | 386    | 390  | -3                                 |
| Pat7               | 300    | 293  | 516    | 510  | -      | -    | 174    | 173  | -                                  |
| Pat8               | 637    | 640  | 987    | 980  | 70     | 70   | 129    | 129  | -                                  |
| Pat9               | 888    | 913  | 1639   | 1655 | 118    | 113  | 243    | 238  | -                                  |
